# Supplementary material
Source: MDPI journal article supplement (https://www.mdpi.com/2311-5637/8/9/429)
Supplement: s1 [file s1]

---

## Supplementary Materials

### Supplementary File S1: A detailed description of plasmid and strain construction

**Plasmid pRSII426-Gal1/10:** The *CPS1* terminator, *Gal1/Gal10* bidirectional promoter, and *HIS5* terminator fragments were amplified from *S. cerevisiae* BCC39850's gDNA using primers CPS1t-hom-F and CPS1t-hom-R, Gal1-10-hom-F and Gal1-10-hom-R, HIS5t-hom-F and HIS5t-hom-R, respectively. The three fragments were placed between the KpnI/SacI site in pRSII426 to form pRSII426-Gal1/10 using homologous recombination in yeast.

**Plasmid pRSII426-Gal1/10-AsSesTPS:** The *Aquilaria sinensis* sesquiterpene synthase gene (*AsSesTPS*, GenBank accession number: AGV40227) codon-optimized for *S. cerevisiae* expression was synthesized by GenScript and was provided as a pUC57 plasmid. The *AsSesTPS* gene fragment was amplified from the pUC57-AsSesTPS using primers AsSesTPS-F and AsSesTPS-R. The purified fragment was ligated to the BamHI/SalI site of pRSII426-Gal1/10 to create pRSII426-Gal1/10-AsSesTPS.

**Plasmid pRSII426-Gal1/10-AsSesTPS1:** The *Aquilaria sinensis* sesquiterpene synthase 1 gene (*AsSesTPS1*, GenBank accession number: QWB49536) codon-optimized for *S. cerevisiae* expression was synthesized by GenScript and was provided as a pUC57 plasmid. The *AsSesTPS1* gene fragment was amplified from the pUC57-AsSesTPS1 using primers AsSesTPS1-F and AsSesTPS1-R. The purified fragment was ligated to the BamHI/SalI site of pRSII426-Gal1/10 to create pRSII426-Gal1/10-AsSesTPS1.

**Plasmid pRSII426-Gal1/10-AsASS1:** The *Aquilaria sinensis* sesquiterpene synthase gene (*AsASS1*, GenBank accession number: AFV99464) codon-optimized for *S. cerevisiae* expression was synthesized by GenScript and was provided as a pUC57 plasmid. The *AsASS1* gene fragment was amplified from the pUC57-AsASS1 using primers AsASS1-F and AsASS1-R. The purified fragment was ligated to the BamHI/SalI site of pRSII426-Gal1/10 to create pRSII426-Gal1/10-AsASS1.

**Plasmid pRSII426-Gal1/10-AcHS1:** The *Aquilaria crassna* humulene synthase gene (*AcHS1*, GenBank accession number: AMQ67165) codon-optimized for *S. cerevisiae* expression was synthesized by GenScript and was provided as a pUC57 plasmid. The *AcHS1* gene fragment was amplified from the pUC57-AcHS1 using primers AcHS1-F and AcHS1-R. The purified fragment was ligated to the BamHI/SalI site of pRSII426-Gal1/10 to create pRSII426-Gal1/10-AcHS1.

**Plasmid pRSII426-Gal1/10-AmdGS1:** The *Aquilaria microcarpa* delta-guaiene synthase gene (*AmdGS1*, GenBank accession number: AHH25146) codon-optimized for *S. cerevisiae* expression was synthesized by GenScript and was provided as a pUC57 plasmid. The *AmdGS1* gene fragment was amplified from the pUC57-AmdGS1 using primers AmdGS1-F and AmdGS1-R. The purified fragment was ligated to the BamHI/SalI site of pRSII426-Gal1/10 to create pRSII426-Gal1/10-AmdGS1.

**Plasmid pRSII426-Gal1/10-ZzBES2:** The *Zingiber zerumbet* beta-eudesmol synthase gene (*ZzBES2*, GenBank accession number: BAG12021) codon-optimized for *S. cerevisiae* expression was synthesized by GenScript and was provided as a pUC57 plasmid. The *ZzBES2* gene fragment was amplified from the pUC57-ZzBES2 using primers ZzBES2-F and ZzBES2-R. The purified fragment was ligated to the BamHI/SalI site of pRSII426-Gal1/10 to create pRSII426-Gal1/10-ZzBES2.

**Plasmid pRSII426-Gal1/10-CITPS2:** The *Clausena lansium* terpene synthase gene (*CITPS2*, GenBank accession number: ADR71055) codon-optimized for *S. cerevisiae* expression was synthesized by GenScript and was provided as a pUC57 plasmid. The *CITPS2* gene fragment was amplified from the pUC57-CITPS2 using primers CITPS2-F and CITPS2-R. The purified fragment was ligated to the BamHI/SalI site of pRSII426-Gal1/10 to create pRSII426-Gal1/10-CITPS2.

**Plasmid pRSII426-Gal1/10-FPPS-GSG-AcHS1:** The FPP synthase gene (*ERG20*) was amplified from *S. cerevisiae* TBRC 1590's gDNA using primers ERG20gsg-SpeI-F and E20gsgAcHS1-R. The *AcHS1* gene was amplified from pUC57-AcHS1 using primers AcHS1gsg-F and AcHS1gsg-EcoRI-R. These two DNA fragments were assembled together by overlap-extension PCR (OE-

PCR). The resulting cassette was ligated to the *SpeI/EcoRI* sites of pRSII426-Gal1/10 to create pRSII426-Gal1/10-FPPS-GSG-AcHS1.

**Plasmid pRSII426-Gal1/10-FPPS-GSG-AmdGS1:** The FPP synthase gene (ERG20) was amplified from *S. cerevisiae* TBRC 1590's gDNA using primers ERG20gsg-SpeI-F and E20gsgAmdGS1-R. The AmdGS1 gene was amplified from pUC57-AmdGS1 using primers AmdGS1gsg-F and AmdGS1gsg-EcoRI-R. These two DNA fragments were assembled together by overlap-extension PCR (OE-PCR). The resulting cassette was ligated to the *SpeI/EcoRI* sites of pRSII426-Gal1/10 to create pRSII426-Gal1/10-FPPS-GSG-AmdGS1.

**Plasmid pRSII426-Gal1/10-FPPS-GSG-ZzBES2:** The FPP synthase gene (ERG20) was amplified from *S. cerevisiae* TBRC 1590's gDNA using primers ERG20gsg-SpeI-F and E20gsgZzBES2-R. The ZzBES2 gene was amplified from pUC57-ZzBES2 using primers ZzBES2gsg-F and ZzBES2gsg-EcoRI-R. These two DNA fragments were assembled together by overlap-extension PCR (OE-PCR). The resulting cassette was ligated to the *SpeI/EcoRI* sites of pRSII426-Gal1/10 to create pRSII426-Gal1/10-FPPS-GSG-ZzBES2.

**Plasmid pRSII426-Gal1/10-FPPS-GSG-CITPS2:** The FPP synthase gene (ERG20) was amplified from *S. cerevisiae* TBRC 1590's gDNA using primers ERG20gsg-SpeI-F and E20gsgCITPS2-R. The CITPS2 gene was amplified from pUC57-CITPS2 using primers CITPS2gsg-F and CITPS2gsg-EcoRI-R. These two DNA fragments were assembled together by overlap-extension PCR (OE-PCR). The resulting cassette was ligated to the *SpeI/EcoRI* sites of pRSII426-Gal1/10 to create pRSII426-Gal1/10-FPPS-GSG-CITPS2.

**Plasmid pRPR1-gRNA-ERG9p:** To construct pRPR1-gRNA-ERG9p for promoter replacement, the gRNA-ERG9p fragment was amplified from pRPR1-gRNA handle-RPR1t using primers ERG9p-gRNA-F and gRNA-Rev. The 0.13-kb PCR band was gel purified and ligated to the *HindIII/XhoI* site of pRPR1-gRNA handle-RPR1t to yield pRPR1-gRNA-ERG9p.

### **Strain construction**

**Strain BCC39850hlu:** The markerless CRISPR/Cas9 system was employed to create the multi-autotrophic strains BCC39850hlu. Donor DNA for each gene deletion was obtained by overlap extension PCR (OE-PCR). For example, to obtain donor DNA for *HIS3* deletion, the 500-bp upstream and 500-bp downstream fragments were amplified from BCC39850's genomic DNA using primers ScHIS3\_ups\_frag\_F and ScHIS3\_ups\_frag\_R, and primers ScHIS3\_dws\_frag\_F and ScHIS3\_dws\_frag\_R, respectively. The two DNA fragments were assembled together to form the donor DNA by OE-PCR. The purified donor DNA was introduced into competent cells along with the corresponding pRPR1-gRNA plasmid and p414-TEF1p-Cas9-CYC1t. Transformants were selected on a yeast minimal medium with appropriate amino acid dropout(s). Colony PCR of transformants was performed to verify gene deletion.

**Strain FPPY001\_39850:** The ERG10-Gal1/10-ERG20-Ura integration cassette was amplified from pRSII416-ERG10-Gal1/10-ERG20-Ura3 using primers YPRCd15-int-F and YPRCd15-int-R. The PCR product was purified and transformed into *S. cerevisiae* BCC39850hlu to generate strain FPPY001\_39850. Colony PCR was used to verify the genomic integration: YPRCd15-up-F and loxP-seq-R to verify the 5' end and ERG20-RT-F and YPRCd15-dw-R to verify the 3' end. The URA3 selectable marker (for selection on medium lacking uracil) was recycled using the loxP-Cre recombinase system.

**Strain FPPY002\_39850:** The tHMG1-Gal1/10-ERG8-Ura integration cassette was amplified from pRSII416-tHMG1-Gal1/10-ERG8-Ura3 using primers ARS308-int-F and ARS308-int-R. The PCR product was purified and transformed into strain FPPY001\_39850 to generate strain FPPY002\_39850. Colony PCR was used to verify the genomic integration: ARS308-up-F and Ura3-dw-R to verify the 5' end and ERG8-RT-F and ARS308-dw-R to verify the 3' end. The URA3 selectable marker was recycled using the loxP-Cre recombinase system.

**Strain FPPY003\_39850:** The ERG13-Gal1/10-IDI1-Ura integration cassette was amplified from pRSII416-ERG13-Gal1/10-IDI1-Ura3 using primers ARS1021-int-F and ARS1021-int-R. The PCR product was purified and transformed into strain FPPY002\_39850 to generate strain FPPY003\_39850. Colony PCR was used to verify the genomic integration: ARS1021-up-F and

Ura3-dw-R to verify the 5' end and IDI1-RT-F and ARS1021-dw-R to verify the 3' end. The URA3 selectable marker was recycled using the loxP-Cre recombinase system.

**Strain FPPY004\_39850:** The tHMG1-Gal1/10-ERG19-Ura integration cassette was amplified from pRSII416-tHMG1-Gal1/10-ERG19-Ura3 using primers ARS720-int-F and ARS720-int-R. The PCR product was purified and transformed into strain FPPY003\_39850 to generate strain FPPY004\_39850. Colony PCR was used to verify the genomic integration: ARS720-up-F and Ura3-dw-R to verify the 5' end and ERG19-RT-F and ARS720-dw-R to verify the 3' end. The URA3 selectable marker was recycled using the loxP-Cre recombinase system.

**Strain FPPY005\_39850:** The tHMG1-Gal1/10-ERG12-Ura integration cassette was amplified from pRSII416-tHMG1-Gal1/10-ERG12-Ura3 using primers ARS1309-int-F and ARS1309-int-R. The PCR product was purified and transformed into FPPY004\_39850 to generate strain FPPY005\_39850. Colony PCR was used to verify the genomic integration: ARS1309-up-F and Ura3-dw-R to verify the 5' end and ERG12-RT-F and ARS1309-dw-R to verify the 3' end. The URA3 selectable marker was recycled using the loxP-Cre recombinase system.

**Strain FPPY005\_39850 P<sub>MET3</sub>-ERG9:** The CRISPR/Cas9 system was employed to create strain FPPY005\_39850 P<sub>MET3</sub>-ERG9. Donor DNA was amplified from *S. cerevisiae* BCC39850's gDNA using primers Met3p\_F and Met3p\_R. The PCR band of the donor DNA was gel purified and then transformed into competent FPPY005\_39850 cells along with the pRPR1-gRNA-ERG9p and p414-TEF1-Cas9-CYC1t-KAN plasmids. Transformants were selected on a minimal yeast medium with 100 µg/mL G418 and L-leucine dropouts.

**Table S1.** Primers used in this study.

| Primer Name                         | Primer Sequence (5' to 3')                                       |
|-------------------------------------|------------------------------------------------------------------|
| <b>Plasmid construction primers</b> |                                                                  |
| tHMG1t-R                            | TAGGGCGAATTGGGTACCGGGCCCCCCTCGAGGTCGACGTTTTTGA<br>GTTTTTTCGTTG   |
| tHMG1-F                             | TACCTCTATACTTTAACGTCAAGGAGAAAAAACTATAATGGCAGACC<br>AATTGGTGAAAAC |

|           |                                                                  |
|-----------|------------------------------------------------------------------|
| Gal1-10-F | TATAGTTTTTCTCCTTGACG                                             |
| Gal1-10-R | TTATATTGAATTTTCAAAAATTCTTAC                                      |
| ERG12-F   | CAAAAAAAAAAGTAAGAATTTTGGAAAATTCAATATAAATGTCATTAC<br>CGTTCCTAAC   |
| ERG12t-R  | CTGGAGCTCCACCGCGGTGGCGGCCGCTCTAGAACTAGTGGGATTGA<br>ATGGCTATTTAAC |
| ERG8-F    | ATCCAAAAAAAAAGTAAGAATTTTGGAAAATTCAATATAAATGTCAG<br>AGTTGAGAGCC   |
| ERG8t-R   | GGAGCTCCACCGCGGTGGCGGCCGCTCTAGAACTAGTTCTAGAAAGT<br>TTATTTATCGTTC |
| ERG19-F   | ATCCAAAAAAAAAGTAAGAATTTTGGAAAATTCAATATAAATGACC<br>GTTTACACAGCA   |
| ERG19t-R  | GCTGGAGCTCCACCGCGGTGGCGGCCGCTCTAGAACTAGTCATGTAG<br>GGAGGTCATGATA |
| ERG13-F   | GGCGAATTGGGTACCGGGCCCCCCTCGAGGTCGACAGATTATTGT<br>GTTATAAATATAG   |
| ERG13t-R  | ATACTTTAACGTCAAGGAGAAAAAACTATAATGAACTCTCAACTA<br>AAC             |
| IDI1-F    | AAAGTAAGAATTTTGGAAAATTCAATATAAATGACTGCCGACAACA<br>AT             |
| IDI1t-R   | GAGCTCCACCGCGGTGGCGGCCGCTCTAGAACTAGTAAGAGAAAAA<br>AAAAATGTGAAC   |
| ERG10-F   | GGCGAATTGGGTACCGGGCCCCCCTCGAGGTCGACGTAATTAGTGG<br>AACTTGTG       |
| ERG10t-R  | ATACTTTAACGTCAAGGAGAAAAAACTATAATGTCTCAGAACGTTTA<br>C             |
| ERG20-F   | AAAGTAAGAATTTTGGAAAATTCAATATAAATGGCTTCAGAAAAAG<br>AA             |
| ERG20t-R  | GAGCTCCACCGCGGTGGCGGCCGCTCTAGAACTAGTTTCTCGTACTA<br>CCCGTAA       |

|                |                                                                  |
|----------------|------------------------------------------------------------------|
| LoxP-Ura3-F    | ATCTCGAGATAACTTCGTATAGCATACATTATACGAAGTTATAATGT<br>GGCTGTGGTTTCA |
| LoxP-Ura3-R    | TATGTCGACATAACTTCGTATAATGTATGCTATACGAAGTTATAATCA<br>TTACGACCGAGA |
| CPS1t hom F    | GCGTAATACGACTCACTATAGGGCGAATTGGGTACCTTATCATCATC<br>ATTTAAATTTTGA |
| CPS1t hom R    | AATATAAACTAGTAAGCTTGAATTCGCGCAATGATTGAATAGT                      |
| Gal-1-10 hom F | ATTGCGCGAATTCAAGCTTACTAGTTTATATTGAATTTCAAAAATTC<br>TTAC          |
| Gal-1-10 hom R | AATCTATGTCGACTCTAGAGGATCCTATAGTTTTTCTCCTTGACG                    |
| HIS5t hom F    | AACTATAGGATCCTCTAGAGTCGACATAGATTAATTTAAACAGTATA<br>TG            |
| HIS5t hom R    | ATTAACCCCTCACTAAAGGGAACAAAAGCTGGAGCTCAAATTCATCCT<br>CTATCATAGA   |
| AsSesTPS1_F    | ATATGGATCCAAAACAATGTCTGCTGCACAAGTT                               |
| AsSesTPS1_R    | ATATGTCGACTCAAATAGTAATTGGATGAACTAAC                              |
| AsSesTPS_F     | ATATGGATCCAAAACAATGGCAGAACTAATAGACC                              |
| AsSesTPS_R     | ATATGTCGACTTAATCCAATGGTAATTGATGAAC                               |
| AsASS1_F       | ATATGGATCCAAAACAATGTCATCTGCAAAATTGGG                             |
| AsASS1_R       | ATATGTCGACTCAAATTTCAATAGCATGTCTC                                 |
| AcHS1_F        | ATATGGATCCAAAACAATGTCACCAGCACAAGCA                               |
| AcHS1_R        | ATATGTCGACTCAGATTGTAAATGGATGGACC                                 |
| AmdGS1_F       | ATATGGATCCAAAACAATGTCATCTGCTAAATTGGG                             |
| AmdGS1_R       | ATATGTCGACTCAAATTTCAATAGCATGTCTC                                 |
| ZzBES2_F       | ATATGGATCCAAAACAATGGAAAAACAATCC                                  |
| ZzBES2_R       | ATATGTCGACTTACTTGTTAAAATAGTCACAGG                                |
| CITPS2_F       | ATATGGATCCAAAACAATGTCAACTCAACAAGTTTC                             |
| CITPS2_R       | ATATGTCGACTTAATCATCCAATTTAACTGGATC                               |
| Gal1-10_KpnI_F | ATATATGGTACCAGTACGGATTAGAAGCCG                                   |
| HIS5t_EcoRI_R  | ATATATGAATTCAAATTCATCCTCTATCATAGAAAC                             |
| Ups_rDNA_HA_F  | ACCTACCGACCAACTTTC                                               |

|                                                                                    |                                                        |
|------------------------------------------------------------------------------------|--------------------------------------------------------|
| Ups_rDNA_HA_R                                                                      | GCTTCTAATCCGTACTAGGACATGCCTTTGATATG                    |
| Gal1-10-TPS2-F                                                                     | ATCAAAGGCATGTCCTAGTACGGATTAGAAGCCG                     |
| TPS2-His5t-R                                                                       | TTGTTGTCTGATTTGTAAATTCATCCTCTATCATAGAAAC               |
| Dws_rDNA_HA_F                                                                      | GATAGAGGATGAATTTACAAATCAGACAACAAAGG                    |
| Dws_rDNA_HA_R                                                                      | GCGAAACCACAGCCAAG                                      |
| <b>Primers for constructing GSG-linked and GGGGS-linked enzyme fusion plasmids</b> |                                                        |
| ERG20gsg-SpeI-F                                                                    | ATATATACTAGTAAAACAATGGCTTCAGAAAAAGAAATTAG              |
| E20gsgCITPS2-R                                                                     | TGAGTTGACATTCCAGAACCCTTTACTTCTCTTGTAACCTTG             |
| CITPS2gsg-F                                                                        | AGAGAAGTAAAGGTTCTGGAATGTCAACTCAACAAGTTTC               |
| CITPS2gsg-EcoRI-R                                                                  | ATATATGAATTCTTAATCATCCAATTTAACTGG                      |
| E20gsgAchS1-R                                                                      | GCTGGTGACATTCCAGAACCCTTTACTTCTCTTGTAACCTTG             |
| AchS1gsg-F                                                                         | AGAGAAGTAAAGGTTCTGGAATGTCACCAGCACAAGCA                 |
| AchS1gsg-EcoRI-R                                                                   | ATATATGAATTCTCAGATTGTAAATGGATGGACC                     |
| E20gsgAmdGS1-R                                                                     | GCAGATGACATTCCAGAACCCTTTACTTCTCTTGTAACCTTG             |
| AmdGS1gsg-F                                                                        | AGAGAAGTAAAGGTTCTGGAATGTCATCTGCTAAATTGGG               |
| AmdGS1gsg-EcoRI-R                                                                  | ATATATGAATTCTCAAATTTCAATAGCATGTCTC                     |
| E20gsgZzBES2-R                                                                     | TGTTTTTCCATTCCAGAACCCTTTACTTCTCTTGTAACCTTG             |
| ZzBES2gsg-F                                                                        | AGAGAAGTAAAGGTTCTGGAATGGAAAAACAATCCTTAACC              |
| ZzBES2gsg-EcoRI-R                                                                  | ATATATGAATTCTTACTTGTTAAAATAGTCACAGG                    |
| E20ggggsCITPS2-R                                                                   | GTTGACATggaccaccgcctccTTTACTTCTCTTGTAACCTTG            |
| CITPS2ggggs-F                                                                      | GAAGTAAAggagcggtgggtccATGTCAACTCAACAAGTTTC             |
| E20ggggsAmdGS1-R                                                                   | GATGACATggaccaccgcctccTTTACTTCTCTTGTAACCTTG            |
| AmdGS1ggggs-F                                                                      | GAAGTAAAggagcggtgggtccATGTCATCTGCTAAATTGGG             |
| E20ggggsAchS1-R                                                                    | GGTGACATggaccaccgcctccTTTACTTCTCTTGTAACCTTG            |
| AchS1ggggs-F                                                                       | GAAGTAAAggagcggtgggtccATGTCACCAGCACAAGCA               |
| E20ggggsZzBES2-R                                                                   | TTTTCCATggaccaccgcctccTTTACTTCTCTTGTAACCTTG            |
| ZzBES2ggggs-F                                                                      | GAAGTAAAggagcggtgggtccATGGAAAAACAATCCTTAACC            |
| <b>CRISPR gRNA plasmid primers</b>                                                 |                                                        |
| ERG9p-gRNA-F                                                                       | ATAAAGCTTCTTTCCATTTATATAGCCCGGTTTTAGAGCTAGAAATAG<br>CA |



|                                   |                                                                   |
|-----------------------------------|-------------------------------------------------------------------|
| HIS3-gRNA-F                       | ATAAAGCTTCATGCTCTGGCCAAGCATTTCGTTTTAGAGCTAGAAATAG<br>CA           |
| URA3-gRNA-F                       | ATAAAGCTTTGTTAGCGGTTTGAAGCAGGGTTTTAGAGCTAGAAATA<br>GCA            |
| LEU2-gRNA-F                       | ATAAAGCTTGTTGTCAGAGAATTAGTGGGGTTTTAGAGCTAGAAATA<br>GCA            |
| gRNA-Rev                          | ATACTCGAGAAAAAAGCACCG                                             |
| <b>Genome integration primers</b> |                                                                   |
| YPRCd15-int-F                     | AAGAAAGAAAACTAACACATTAATGTAGTTTTAAAATTCAGGGTA<br>CCGGGCCCATTAAC   |
| YPRCd15-int-R                     | AATTTTTATTCTAGCATATATTTAAGTTTGTTTGCAGAACCCCGGCCG<br>CTCTAGAACTAG  |
| ARS308-int-F                      | TGAAATTTCAACATTAACCTCGAATTTTTCTTTTTATCTAACCCCCC<br>CTCGAGATAAC    |
| ARS308-int-R                      | GTGGTAGCAATATGTAGCAAAGAAGACAAGTAATCCTTCTAGAAAG<br>TTTATTTATCGTTC  |
| ARS1021-int-F                     | ACTCAAATTTCCAGTGTCTCTTAGCAGTTAAACCATTCTGGGGTAC<br>CGGGCCCATTAAC   |
| ARS1021-int-R                     | GAATTTTCATCACGTGCGTATTATCTCTTAACCTATAATGCCACGGCCG<br>CTCTAGAACTAG |
| ARS720-int-F                      | TGTTACTGTTGATTGTTTCGTTTATTTGTATAATTGAGTTTACACCCCCC<br>TCGAGATAAC  |
| ARS720-int-R                      | ATAAGTTTGCTTTTTGTCACTCTCTTGGCCCTAATTACCATGTAGGGAG<br>GTCATGATATG  |
| ARS1309-int-F                     | CATTCTAGTATCAAAGAACTTACTATGACGCAGTTTAGGATCCCCC<br>CCTCGAGATAAC    |
| ARS1309-int-R                     | CTGAATAACAAGGGGCTTACGATGGAGTAGTAGACCTGGGATTGA<br>ATGGCTATTTAAC    |
| Met3p_F                           | GTTTTGGGTTTAGTGCCTAAACGAGCAGCGAGAACACGATTTAGTACT<br>AACAGAGACTTT  |

|                                                   |                                                                  |
|---------------------------------------------------|------------------------------------------------------------------|
| Met3p_R                                           | GACCGGATGCAATGCCAATTGTAATAGCTTTCCCATGTTAATTATACT<br>TTATTCTTGTTA |
| ScHIS3_ups_frag_F                                 | TCGACGTGGGCCTTTTTC                                               |
| ScHIS3_ups_frag_R                                 | CTTTAAATAATCGGTGTCACTACATCTTTGCCTTCGTTTATC                       |
| ScHIS3_dws_frag_F                                 | GATAAACGAAGGCAAAGATGTAGTGACACCGATTATTTAAAG                       |
| ScHIS3_dws_frag_R                                 | TAACCACCACGACGGTTG                                               |
| ScURA3_ups_frag_F                                 | CATCATCTCATGGATCTGCAC                                            |
| ScURA3_ups_frag_R                                 | CATTTACTTATAATACAGTTTTTTACATGATTTATCTTCGTTTCCTG                  |
| ScURA3_dws_frag_F                                 | CAGGAAACGAAGATAAATCATGTAAAAAACTGTATTATAAGTAAATG                  |
| ScURA3_dws_frag_R                                 | GCGTTTTGTTCTTGGAAC                                               |
| ScLEU2_ups_frag_F                                 | TAATTGGTTGTTTGGCCG                                               |
| ScLEU2_ups_frag_R                                 | CATAAAAAAAGAGAATCTTTTTACATTAGAATGGTATATCCTTG                     |
| ScLEU2_dws_frag_F                                 | CAAGGATATACCATCTAATGTAAAAAGATTCTCTTTTTTTATG                      |
| ScLEU2_dws_frag_R                                 | GATTTAGTACTGAAGAGGAGG                                            |
| <b>Colony PCR primers for strain verification</b> |                                                                  |
| YPRCd15-up-F                                      | TCCAAATCACGTCAAGAC                                               |
| loxP-seq-R                                        | GTCGACCTCGAGATAACT                                               |
| ERG20-RT-F                                        | CTACAACACTCCAGGCGGTA                                             |
| YPRCd15-dw-R                                      | GGTTTCGATTGTTGGCAAAGAC                                           |
| ARS308-up-F                                       | CAAACCAACAGATATAGGC                                              |
| Ura3-dw-R                                         | CATTACGACCGAGATTCCC                                              |
| ERG8-RT-F                                         | GTTACCGAACATCGTGGCAA                                             |
| ARS308-dw-R                                       | GAAGGGTTCGGTTTATATG                                              |
| ARS1021-up-F                                      | ATAACTGCTTGCAGCGGC                                               |
| IDI1-RT-F                                         | GACGTCAAATGACGAAAGCG                                             |
| ARS1021-dw-R                                      | CGTGGATTTATGAATCCGGG                                             |
| ARS720-up-F                                       | TTGAGCGGTTTGTTACTG                                               |
| ERG19-RT-F                                        | AAATTGTCTGCGCGACCTAC                                             |
| ARS720-dw-R                                       | GCGAACACTTGTCATTTG                                               |
| ARS1309-up-F                                      | TAGTTTGTAGCTGGTGGC                                               |
| ERG12-RT-F                                        | AGATCTTGTTGCTCGCGTTC                                             |

|                                                                                                     |                       |
|-----------------------------------------------------------------------------------------------------|-----------------------|
| ARS1309-dw-R                                                                                        | CCCGCATATGATCTGGAC    |
| HIS3 upst F                                                                                         | AACACAGTCCTTTCCCGC    |
| HIS3 dwst R                                                                                         | GCCTCGTTCAGAATGACAC   |
| LEU2 upst F                                                                                         | CCGGAACCGGCTTTTCAT    |
| LEU2 dwst R                                                                                         | TCCTCCTTTTTCTCCTTCTTG |
| URA3 upst F                                                                                         | CGAGCAGAAGGAAGAACG    |
| URA3 dwst R                                                                                         | CATTACGACCGAGATTCCC   |
| MET3p_seq_F                                                                                         | GTGACCAGAAAAGTCACGTG  |
| ERG9_int_R                                                                                          | GCATTTCCGTCGAAACTCCA  |
| <b>Real-time PCR primers to quantify the relative expression levels of mevalonate pathway genes</b> |                       |
| TAF10-RT-F                                                                                          | GCGAGAGCTAGGCAGCTATT  |
| TAF10-RT-R                                                                                          | ATCGTTCACCGTCAGAACAA  |
| ERG10-RT-F                                                                                          | CCAGACAAGTTGCTTTGGCT  |
| ERG10-RT-R                                                                                          | CCAGCTACGACAACATCAGC  |
| ERG20-RT-F                                                                                          | CTACAACACTCCAGGCGGTA  |
| ERG20-RT-R                                                                                          | TGCAACAACCTCAATGCACCA |
| tHMG1-RT-F                                                                                          | GACTACGACCGCGTATTTGG  |
| tHMG1-RT-R                                                                                          | ACAACCCTCTGTAGTTGCCA  |
| ERG8-RT-F                                                                                           | GTTACCGAACATCGTGGCAA  |
| ERG8-RT-R                                                                                           | AAGGAGGCCAAAGCTGTAGT  |
| ERG13-RT-F                                                                                          | GCCATTGTAGTTTGCGGTGA  |
| ERG13-RT-R                                                                                          | TCAGGACCGATCCACATAGC  |
| IDI1-RT-F                                                                                           | GACGTCAAATGACGAAAGCG  |
| IDI1-RT-R                                                                                           | AAGACGGAGAATGCACGATG  |
| ERG19-RT-F                                                                                          | AAATTGTCTGCGCGACCTAC  |
| ERG19-RT-R                                                                                          | ACCAGCTGCTGTAGGAAAGT  |
| ERG12-RT-F                                                                                          | AGATCTTGTTGCTCGCGTTC  |
| ERG12-RT-R                                                                                          | CTCGTCATCGGTGCCTTTAC  |

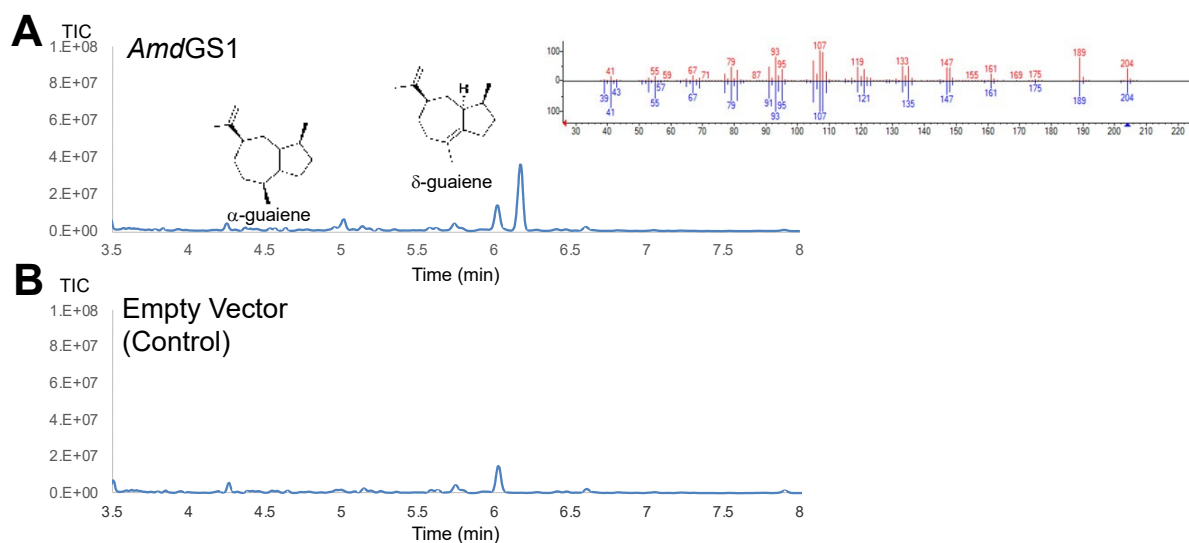

**Figure S1.** Total ion chromatograms (left panel) and mass spectra (right panel) obtained from GC-MS analysis of dodecane samples from the cultivation of strains FPPY005\_39850 harboring pRSII426-Gal1/10-*AmdGS1* (A) and FPPY005\_39850 harboring the empty vector pRSII426-Gal1/10 (B).

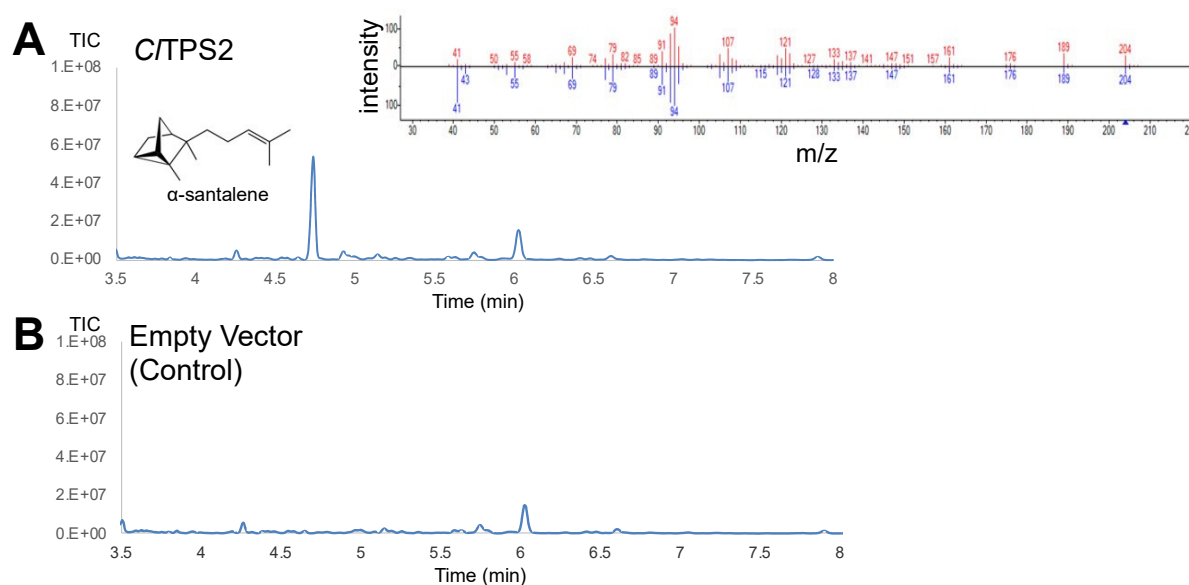

**Figure S2.** Total ion chromatograms (left panel) and mass spectra (right panel) obtained from GC-MS analysis of dodecane samples from the cultivation of strains FPPY005\_39850 harboring

pRSII426-Gal1/10-*C/TPS2* (A) and FPPY005\_39850 harboring the empty vector pRSII426-Gal1/10 (B).

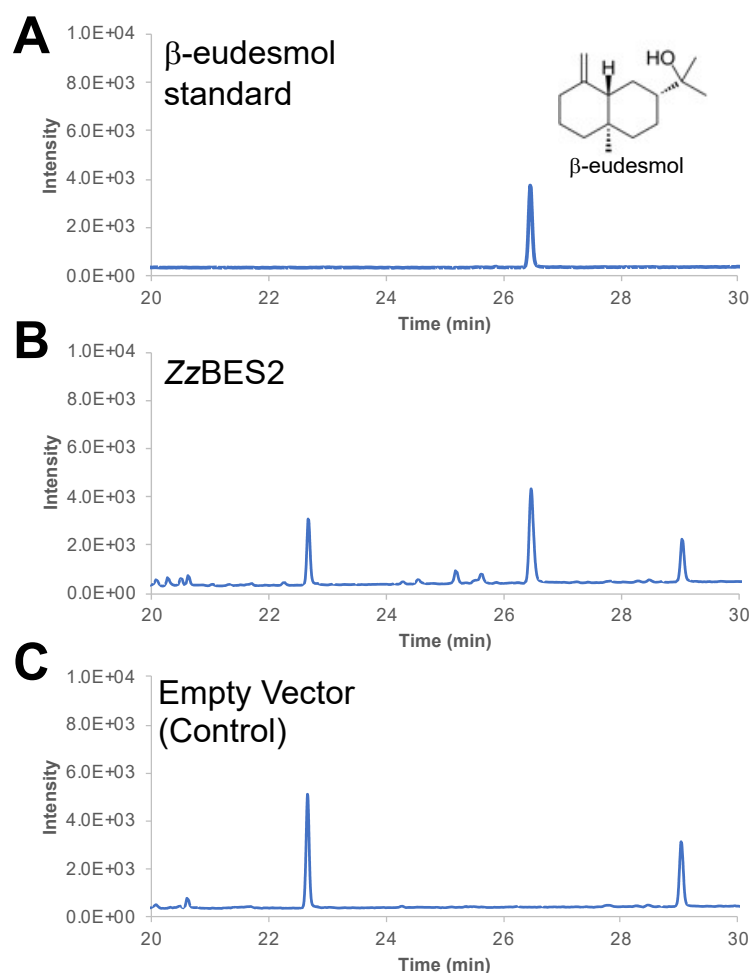

**Figure S3.** GC-FID analysis of an authentic standard for β-eudesmol (A) and dodecane samples from the cultivation of strains FPPY005\_39850 harboring pRSII426-Gal1/10-ZzBES2 (B) and FPPY005\_39850 harboring the empty vector pRSII426-Gal1/10 (C).

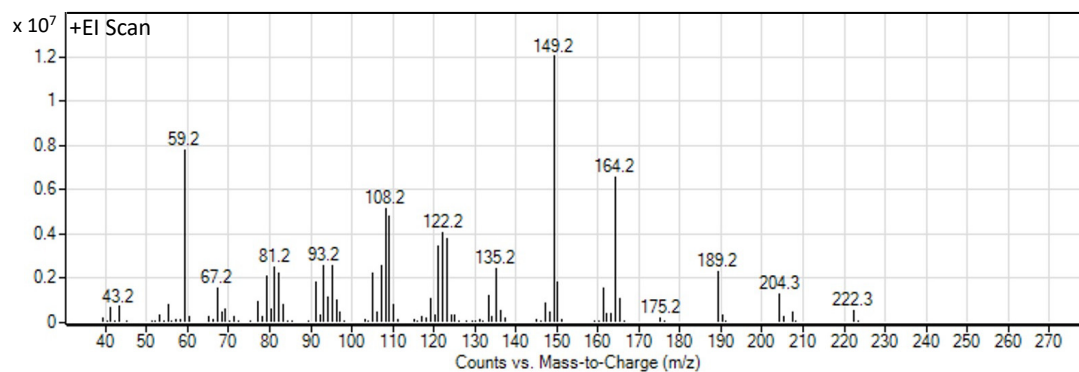

**Figure S4.** Mass spectra obtained from GC-MS analysis of the dodecane sample containing b-eudesmol from the cultivation of strain FPPY005\_39850 harboring pRSII426-Gal1/10-ZzBES2.

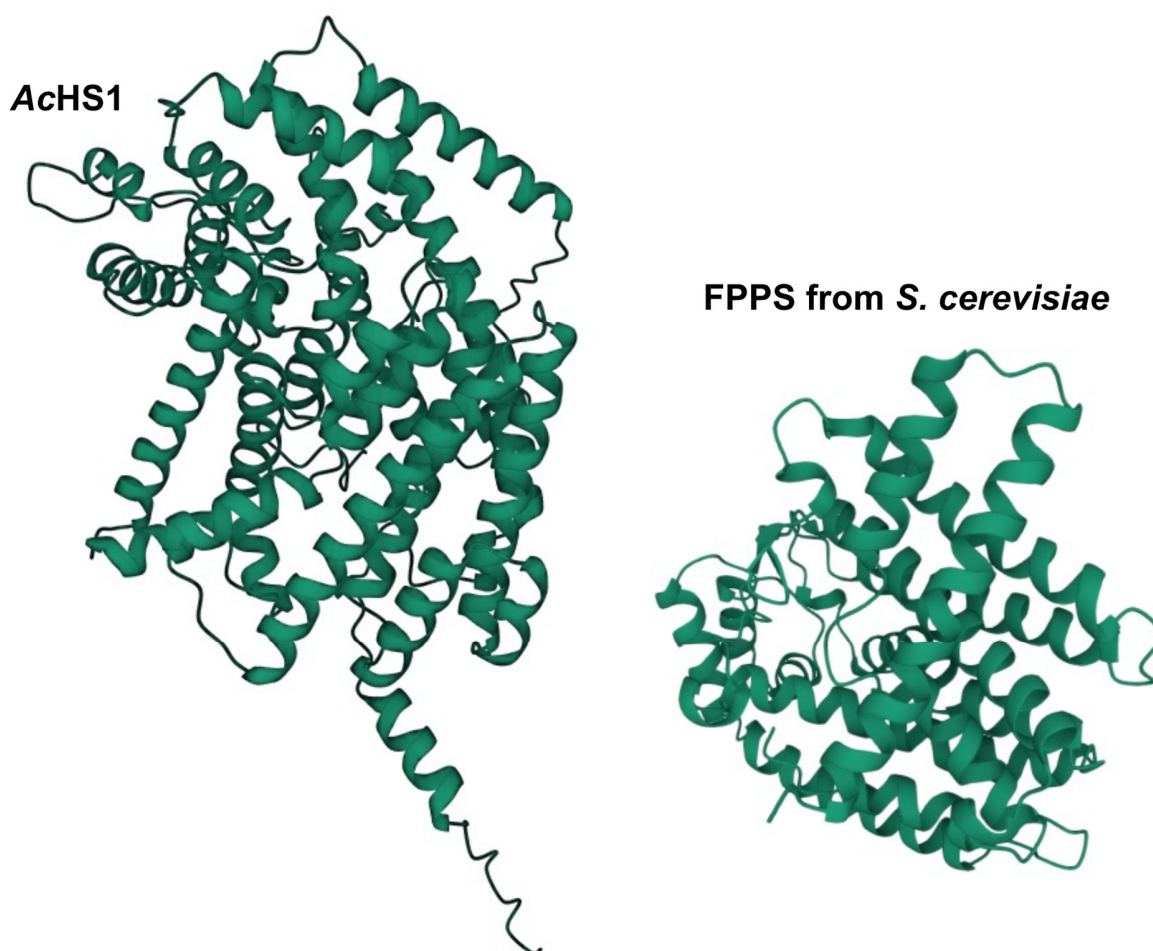

**Figure S5.** AlphaFold-predicted structures of the AcHS1 and FPPS as standalone enzymes.

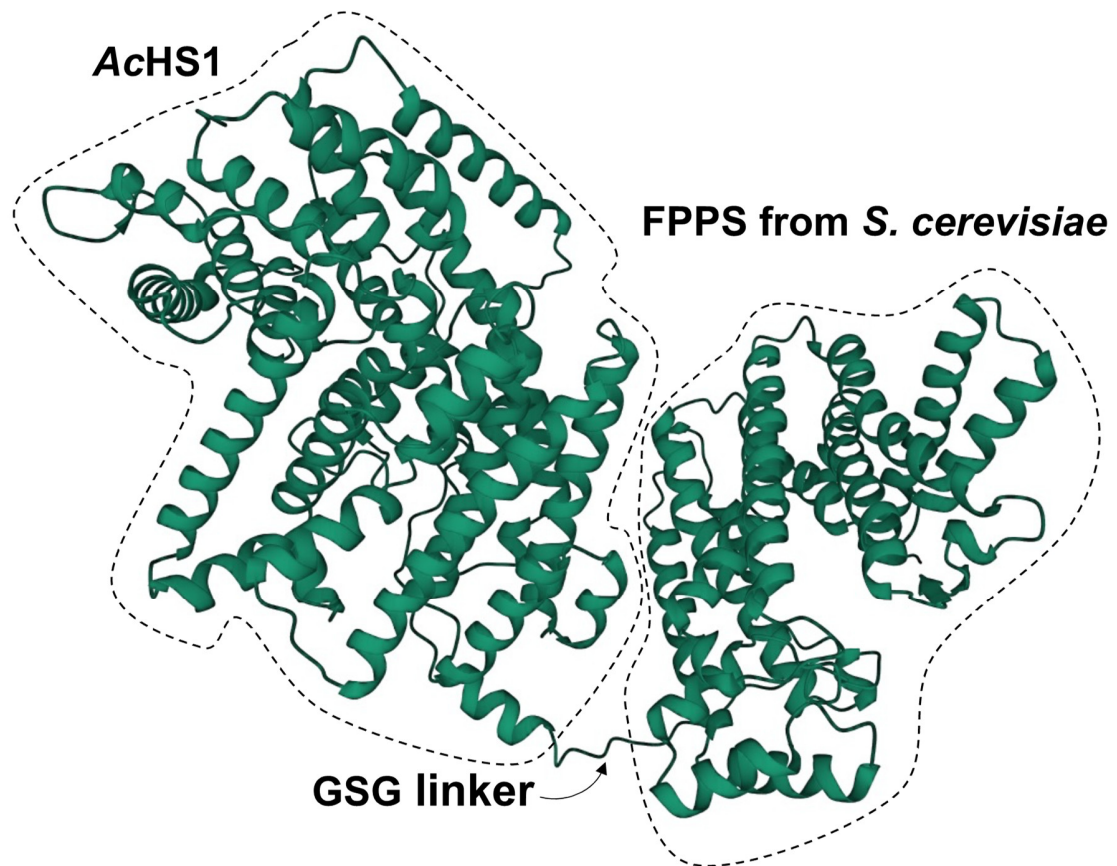

**Figure S6.** AlphaFold-predicted structure of the FPPS-GSG-AcHS1 enzyme fusion.

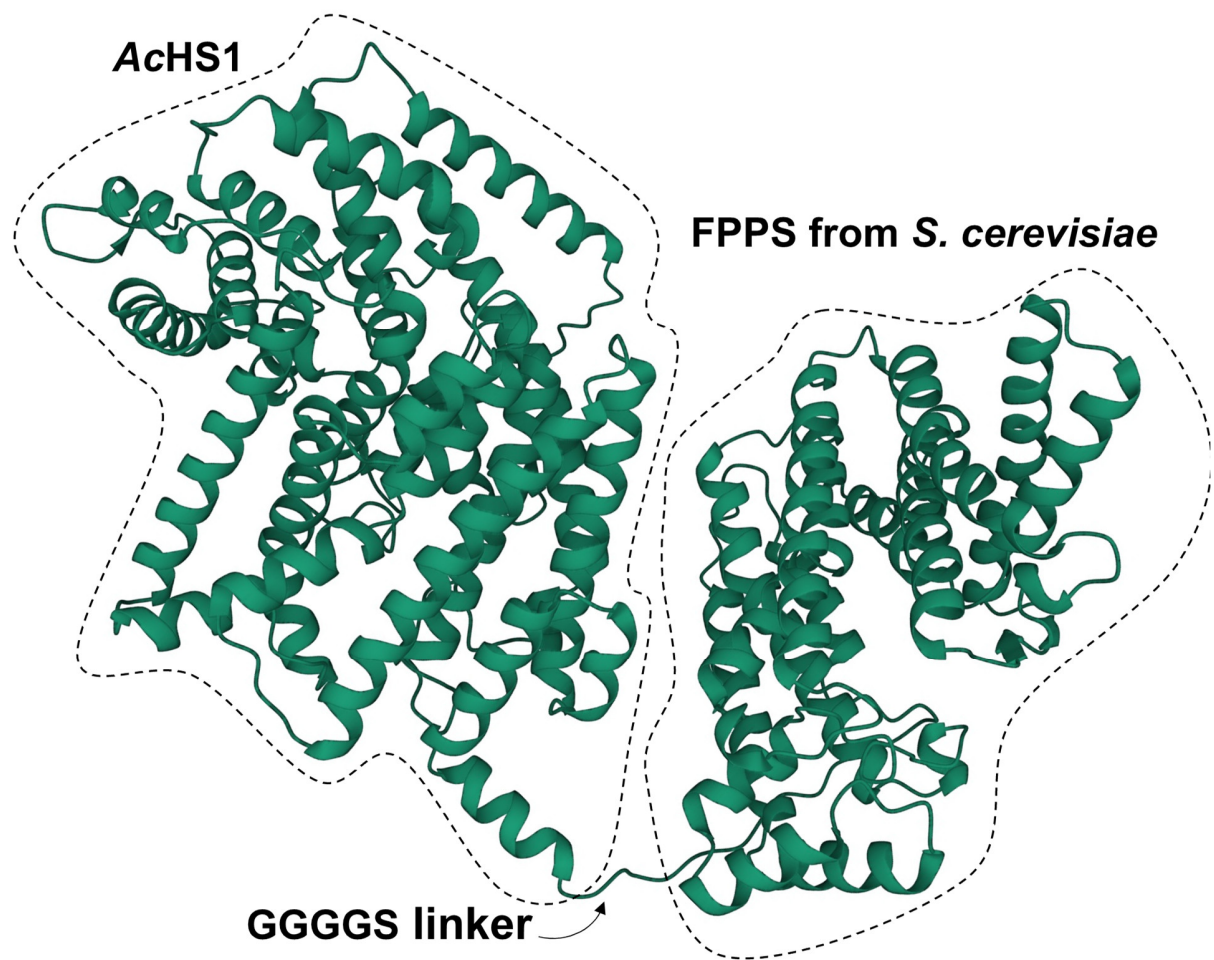

**Figure S7.** AlphaFold-predicted structure of the FPPS-GGGGS-AcHS1 enzyme fusion.



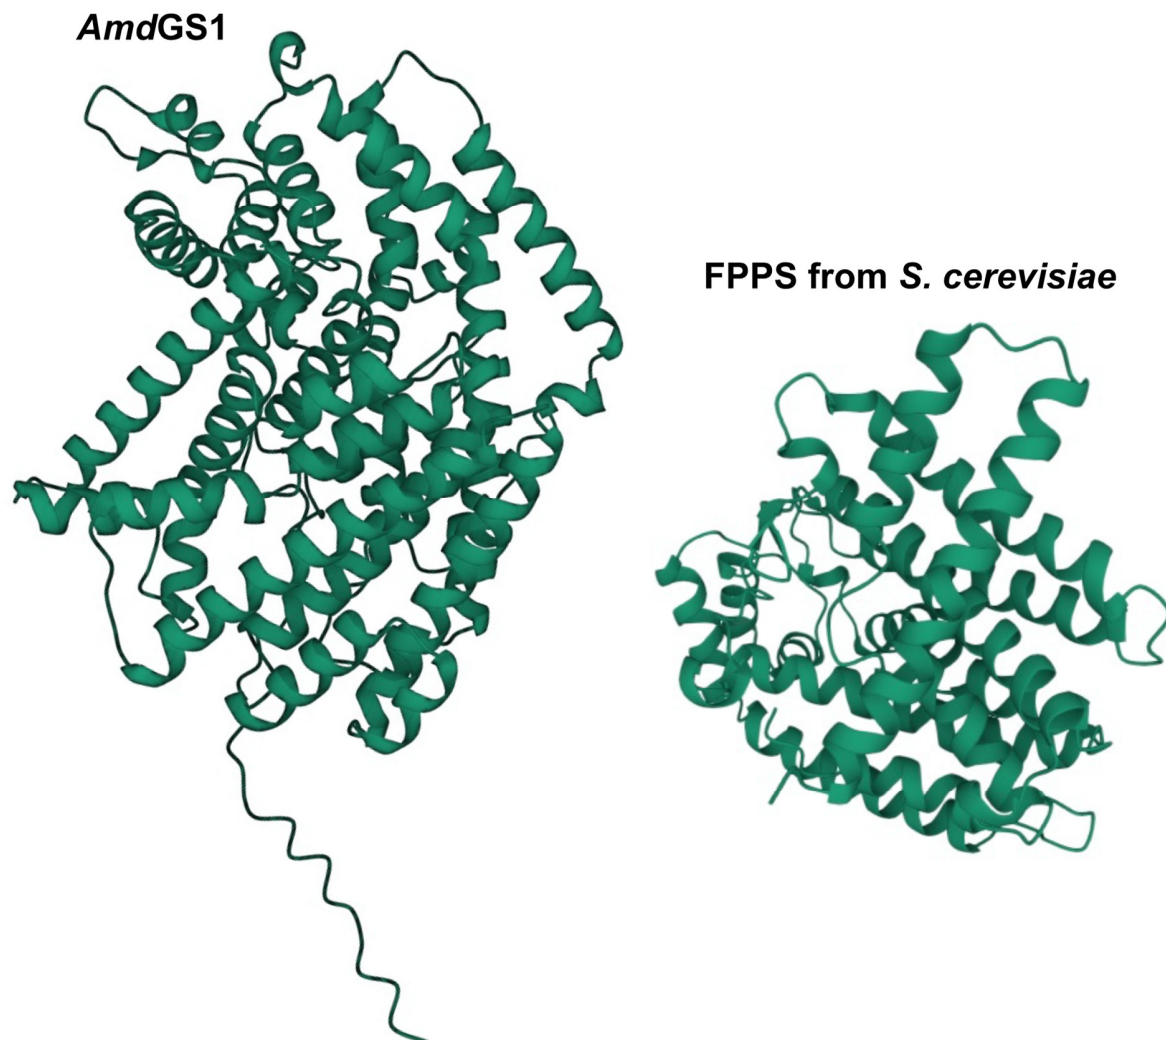

**Figure S8.** AlphaFold-predicted structures of the *AmdGS1* and FPPS as standalone enzymes.

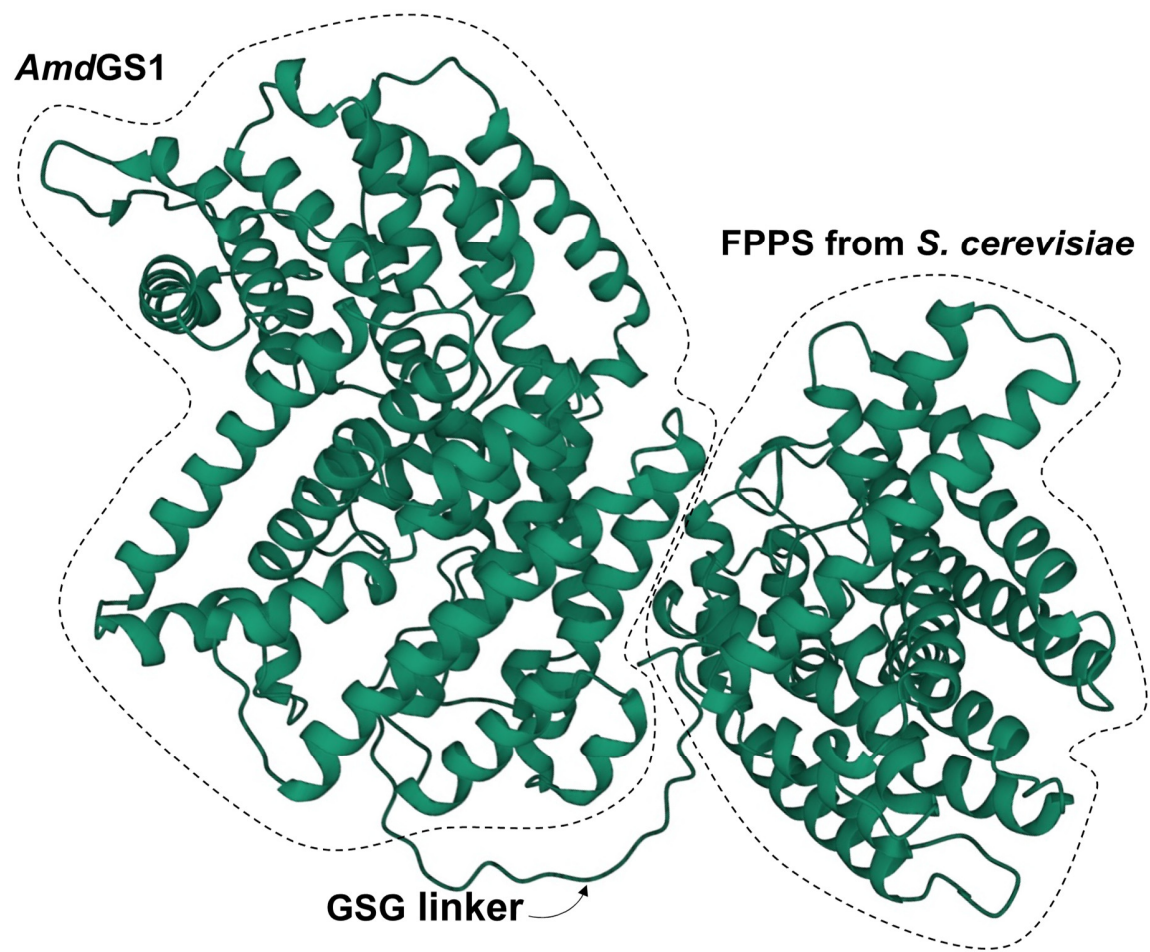

**Figure S9.** AlphaFold-predicted structure of the FPPS-GSG-AmdGS1 enzyme fusion.

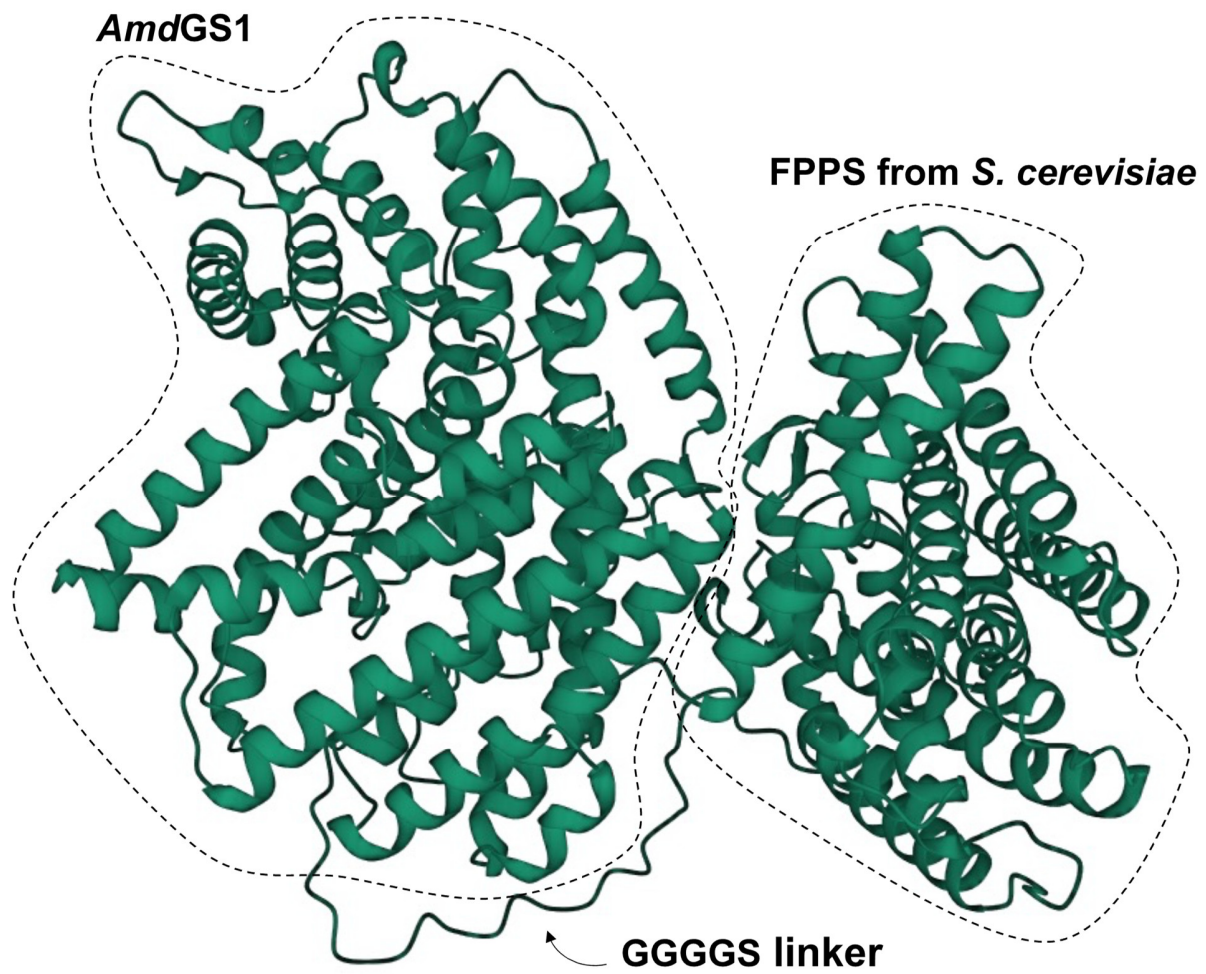

**Figure S10.** AlphaFold-predicted structure of the FPPS-GGGGS-AmdGS1 enzyme fusion.

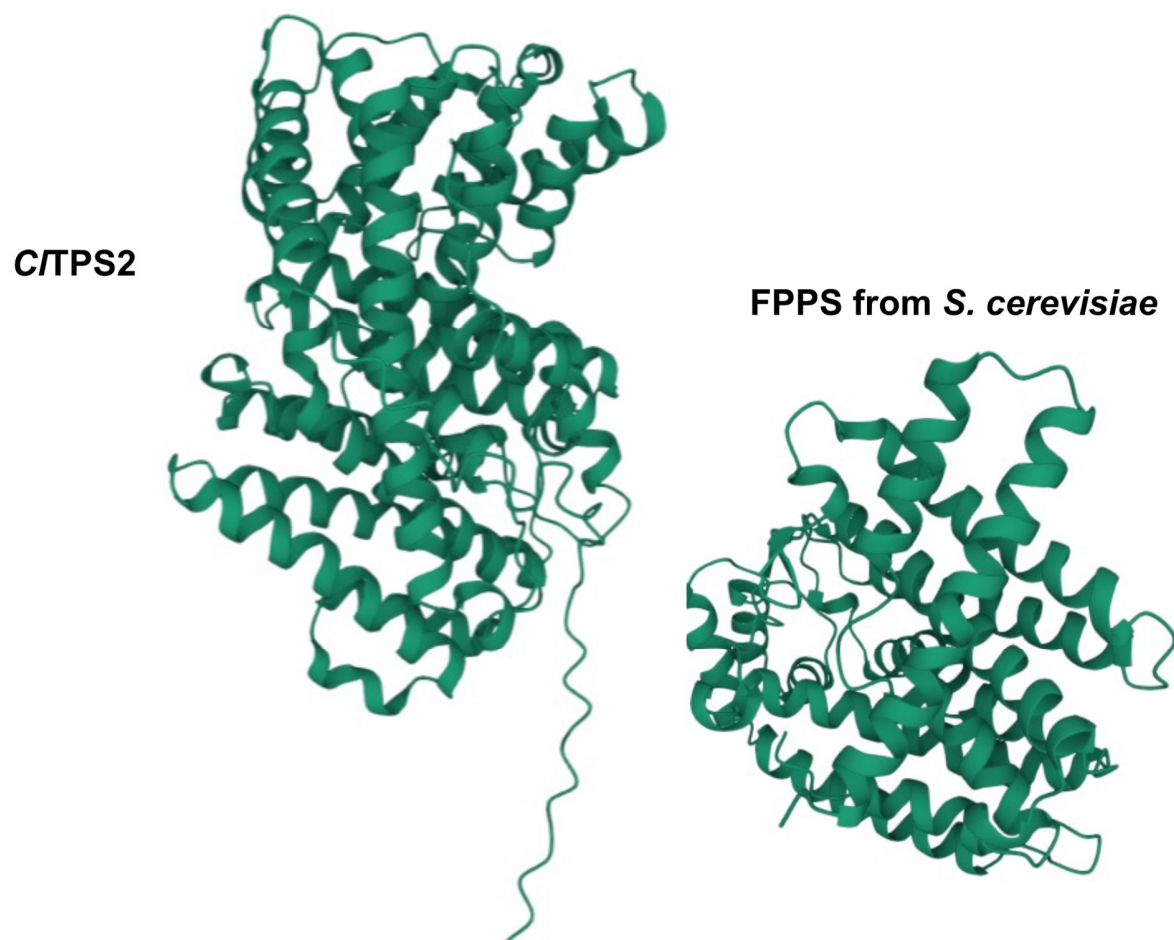

**Figure S11.** AlphaFold-predicted structures of the C/TPS2 and FPPS as standalone enzymes.



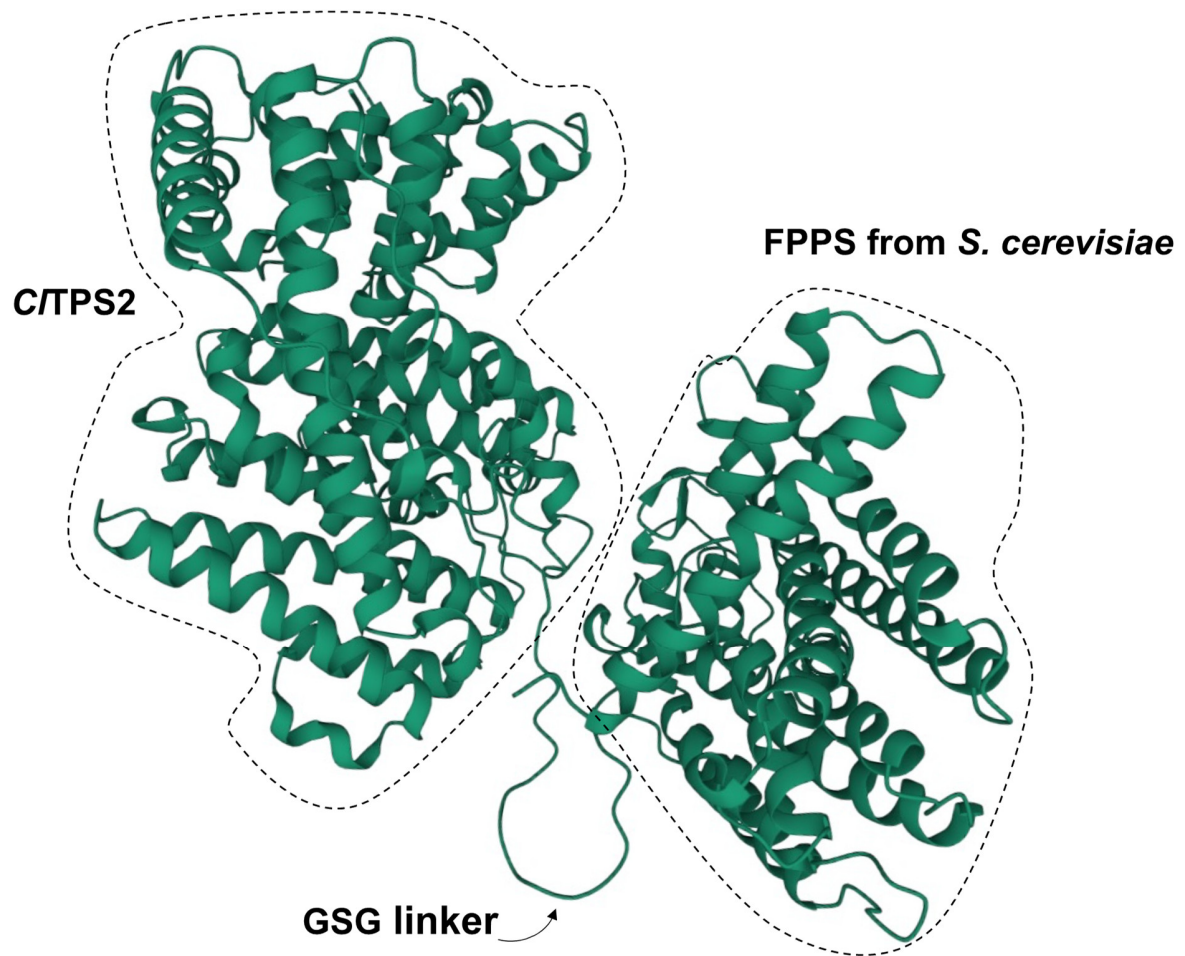

**Figure S12.** AlphaFold-predicted structure of the FPPS-GSG-C/TPS2 enzyme fusion.

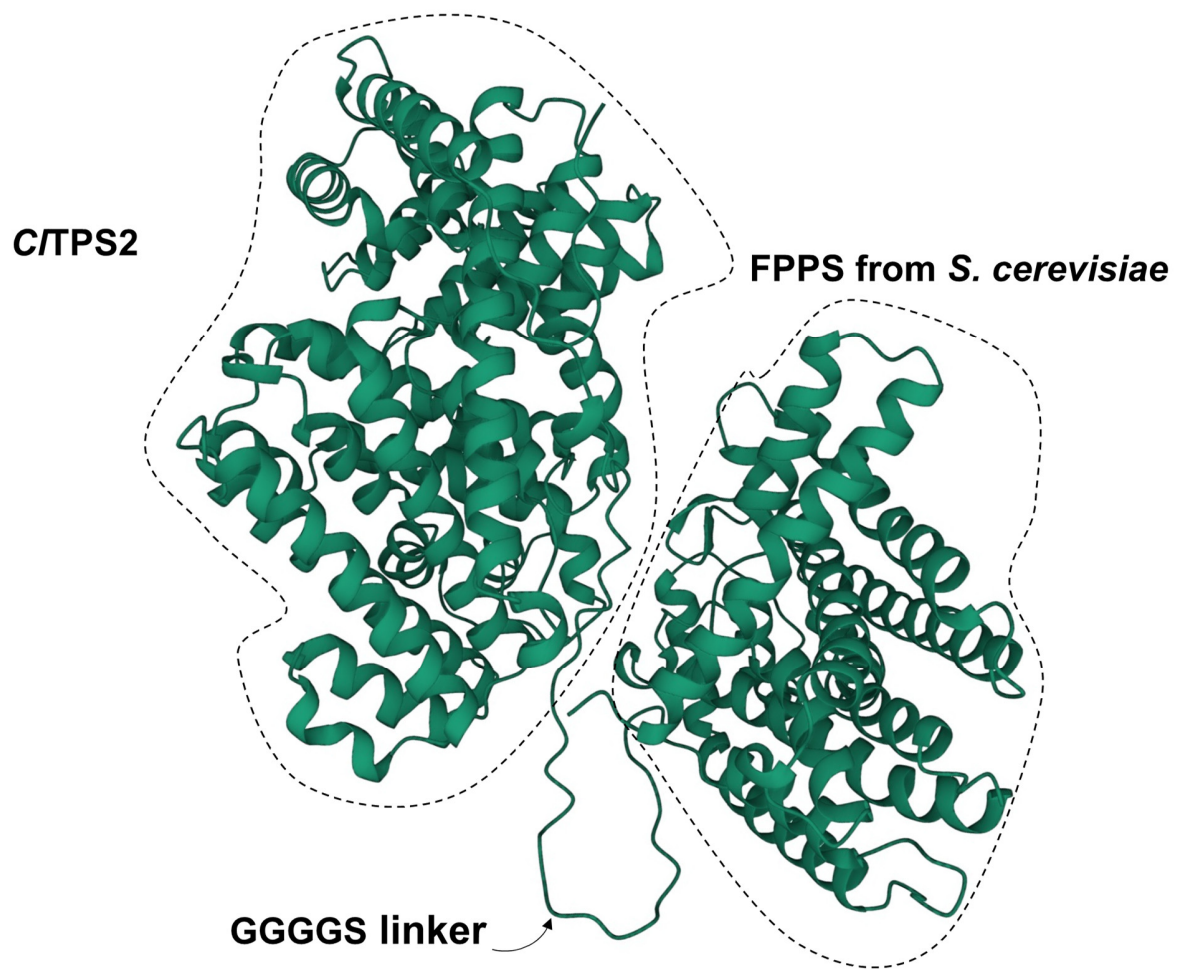

**Figure S13.** AlphaFold-predicted structure of the FPPS-GGGGS-C/TPS2 enzyme fusion.

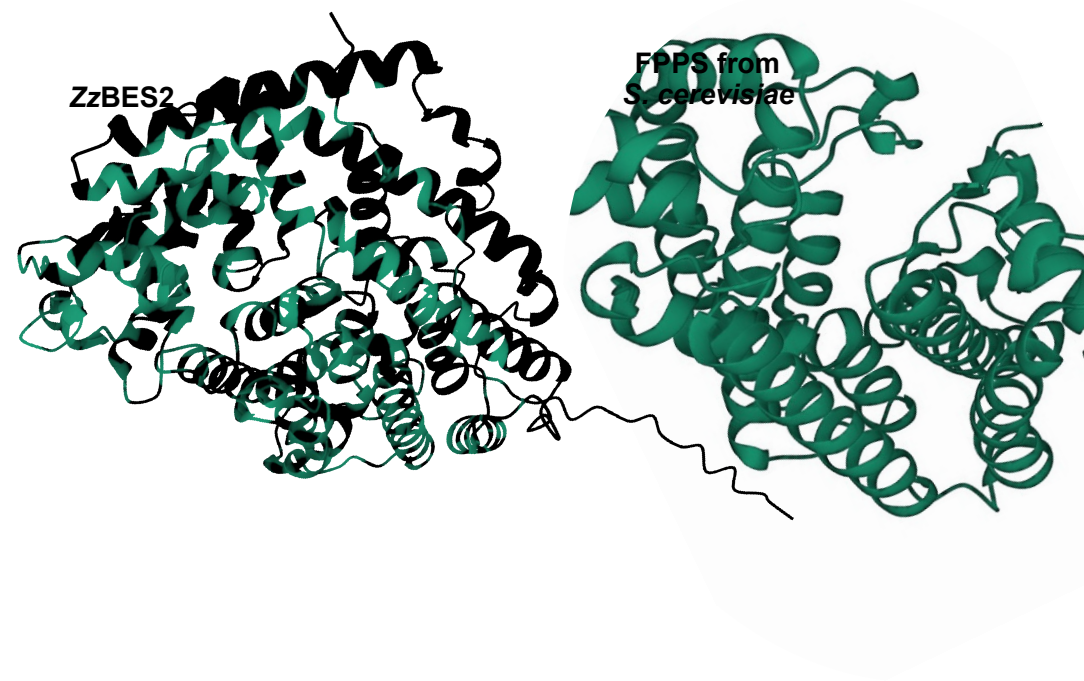

**Figure S14.** AlphaFold-predicted structures of the ZzBES2 and FPPS as standalone enzymes.

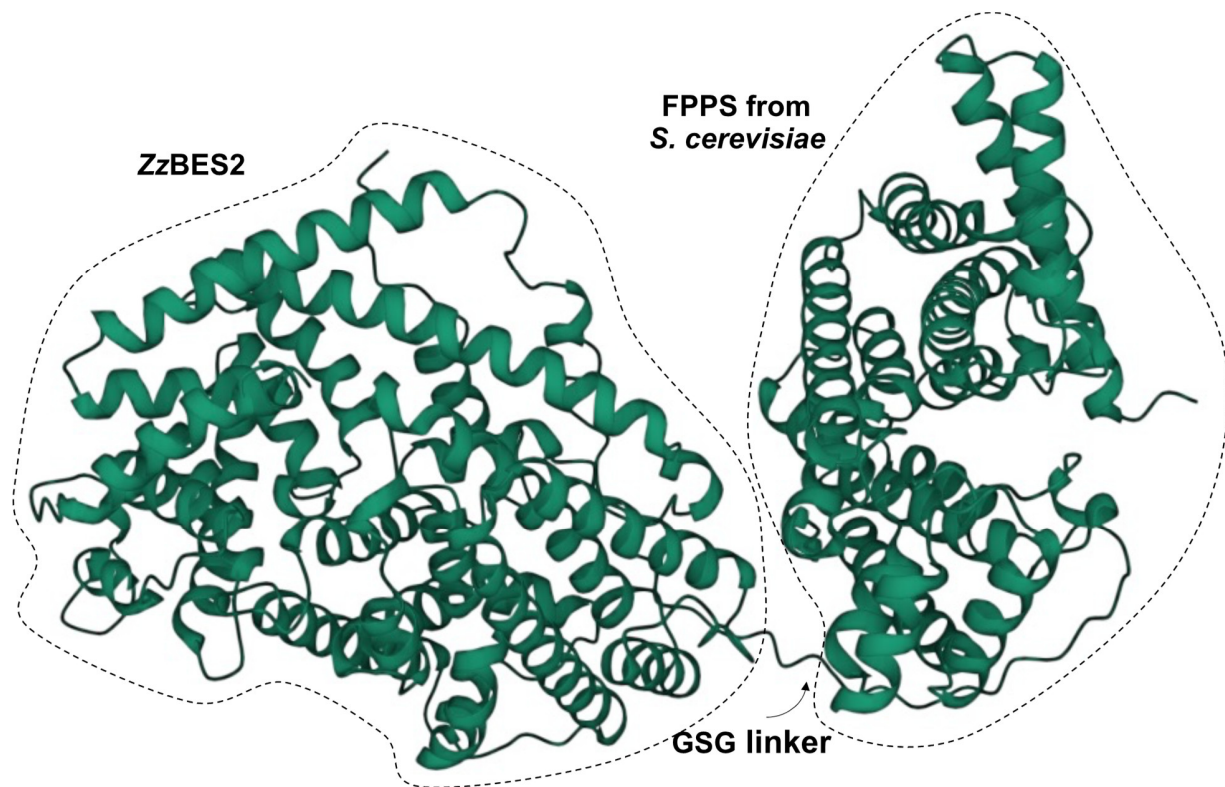

**Figure S15.** AlphaFold-predicted structure of the FPPS-GSG-ZzBES2 enzyme fusion.



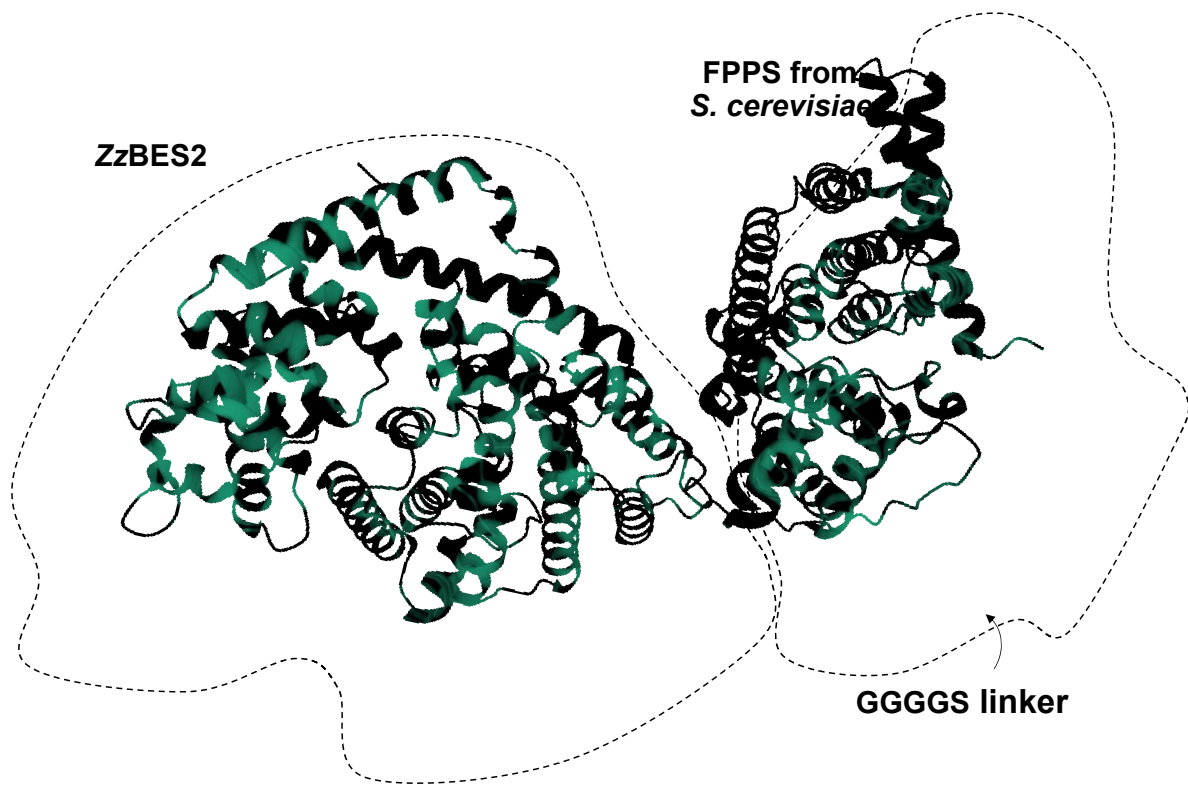

**Figure S16.** AlphaFold-predicted structure of the FPPS-GGGGS-ZzBES2 enzyme fusion.
